# Supplementary material for: A gene expression signature predicts recurrence-free survival in meningioma
Source: PubMed Central journal article supplement (PMC5882319; doi:10.18632/oncotarget.24498), 2018-02-15
Supplement: oncotarget-09-16087-s001.pdf [file oncotarget-09-16087-s001.pdf]

## **A gene expression signature predicts recurrence-free survival in meningioma**

### **SUPPLEMENTARY MATERIALS**

#### **Hematoxylin and eosin staining protocol**

##### **Formalin-fixed paraffin embedded slides:**

Following deparaffinization (heat and xylene) slides were rehydrated in decreasing ethanol concentrations

(100%, 95%, 70%) and placed in hematoxylin (5 minutes) followed by acid alcohol, ammonia water, and eosin (1 minute) then dehydrated in increasing ethanol concentrations (95%, 100%), placed in xylene, then coverslipped while wet.

**Supplementary Table 1: Gene expression levels in both training and validation datasets per risk groups. Data is shown post-normalization.**

See Supplementary File 1

**Supplementary Table 2: Overview of samples in the training dataset.**

See Supplementary File 2

**A**  
TRAINING

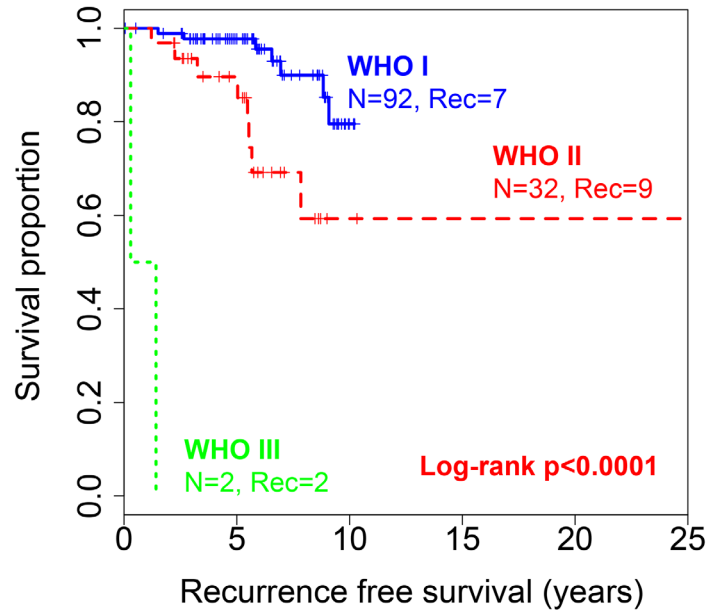

**B**  
VALIDATION

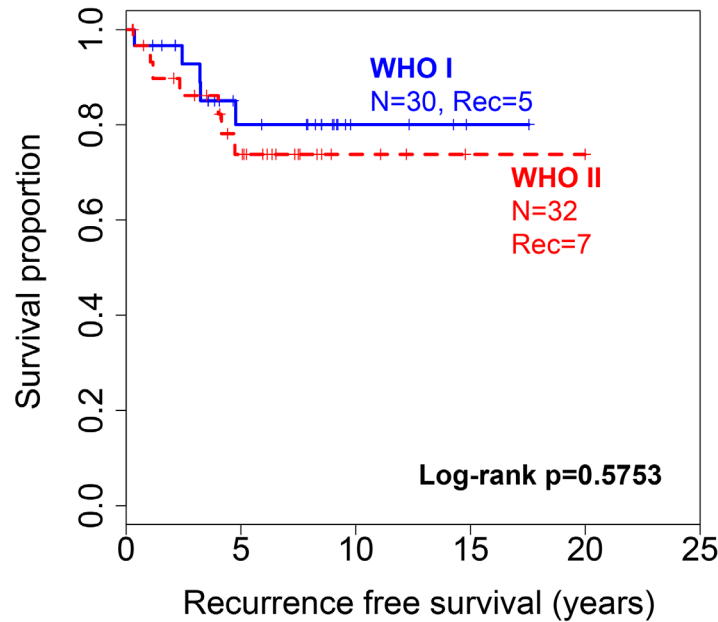

**Supplementary Figure 1:** Kaplan-Meier survival analysis stratified by WHO grade in the TRAINING cohort (n=126\*) (A) and in the VALIDATION cohort (n=62) (B). (Abbreviations: N – number of samples, Rec – number of recurrences, WHO – World Health Organization). \*The WHO grade was missing for one case. **Note:** The 2016 WHO grading criteria for meningioma: **WHO grade I:** less than 4 mitoses per 10 high-power microscope fields (HPF); **WHO grade II (atypical)** (at least one of the following):  $\geq 4$  mitoses but less than 20 mitoses per 10 HPF, brain invasion, clear cell morphology, chordoid morphology, at least 3 of the following 5 morphological features (patternless growth, hypercellularity, small cell change, macronucleoli, necrosis); **WHO grade III (anaplastic)** (at least one of the following):  $\geq 20$  mitoses per 10 HPF, rhabdoid morphology, papillary morphology.

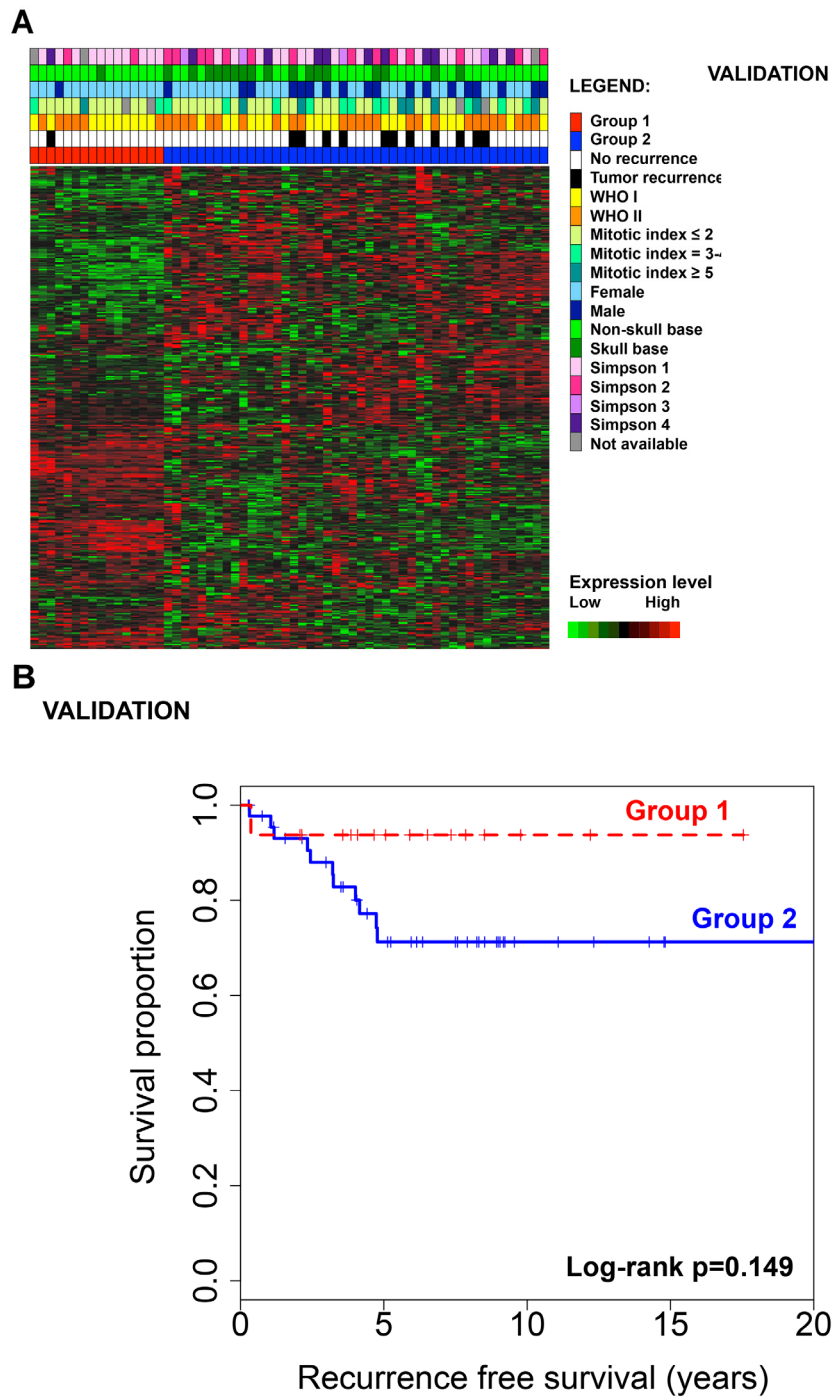

**Supplementary Figure 2:** Unsupervised hierarchical clustering with the initial filtered 393 probe sets in the VALIDATION dataset (n=62) separates 2 differentially expressed groups of tumors. Each row represents a probe set and each column represents a sample. Expression values are shown after batch normalization (A). Kaplan-Meier survival analysis illustrates a trend for decreased tumor recurrence time for patients with meningioma from group 2 (B). *Note:* Simpson grading criteria for meningioma surgical resection: **1** – Gross total resection of meningioma with excision of its dural attachment or involved bone/sinus; **2** - Gross total resection of meningioma with coagulation/cauterization/charring of its dural attachment; **3** - Gross total resection of meningioma without resection or cauterization of its dural attachments or involved bone/sinus; **4** – Subtotal resection of meningioma; **5** – Decompression with or without biopsy.
